# Supplementary material for: Immune‐Responsive Gene 1/Itaconate Activates Nuclear Factor Erythroid 2–Related Factor 2 in Hepatocytes to Protect Against Liver Ischemia–Reperfusion Injury
Source: PubMed Central journal article supplement — Hepatology. 2020 Oct 12;72(4):1394–411. doi: 10.1002/hep.31147 (PMC7702080; doi:10.1002/hep.31147), 2020-10-12

**Supporting FIG. 1.** (A) Confocal microscopy images of livers from WT (C57BL/6NJ) and IRG1<sup>-/-</sup> mice after 1-hour ischemia and 6-hour reperfusion; liver tissues were stained with F4/80 (white), DAPI (blue), and  $\beta$ -actin (green); and images were taken using confocal microscopy (scale bar = 50  $\mu$ m). Area of F4/80 ( $\mu$ m<sup>2</sup>)/ $\beta$ -actin ( $\mu$ m<sup>2</sup>) was quantified and represented in bar graph; n = 4 for each group. (B) Confocal images (scale bar = 50  $\mu$ m) of livers from WT mice after 1-hour ischemia and 6-hour reperfusion; 25 mg/kg body weight of 4-octyl itaconate (4-OI) or vehicle control was injected intraperitoneally 2 hours before hepatic I/R and at the time of reperfusion. Liver tissues were stained with TMR (red), DAPI (blue), and  $\beta$ -actin (green). Percentage of TMR-positive cells was quantified and represented in bar graph; n = 3 per group. Images are representative of data from multiple mice per experimental group. Data are presented as means  $\pm$  SD. \**P* < 0.05.

**Supporting FIG. 2.** (A) Western blot for cleaved caspase-3 and caspase-3 in whole cell lysates from WT (C57BL/6NJ) and IRG1<sup>-/-</sup> hepatocytes treated with or without TNF- $\alpha$  (30ng/ml) for 12 hours. Densitometry of cl-caspase3 bands relative to  $\beta$ -actin loading control was quantified and presented in bar graph. (B-D) Primary hepatocytes isolated from WT (B6J) mice were pretreated with 4-OI or vehicle control 1 hour prior to normoxia or 10-hour hypoxia and 10-hour reoxygenation (H/R). Quantitation of band density in Western blot for Nrf2 and its downstream mediators (HO-1 and NQO1) in whole cell lysates and (E) quantitation of band density in Western blot for nuclear Nrf2 (Nu-Nrf2) in total nuclear protein from hepatocytes after normoxia or H/R. (F,G) Primary hepatocytes isolated from WT (C57BL/6J) and Nrf2<sup>-/-</sup> mice were pretreated with 4-OI (125  $\mu$ M) or vehicle control 1 hour prior to normoxia or H/R (10 hour/10 hour). Quantitation of band density in Western blot for Nrf2 and HO-1 in whole cell lysates. (H,I) Quantitation of band density in Western blot for Nrf2 and HO-1 in whole cell lysates from primary human hepatocytes pretreated with 4-OI (125  $\mu$ M) or vehicle control 1 hour before normoxia or 10-hour hypoxia and 10-hour reoxygenation (H/R). Quantitation of band density was performed across at least three separate blots and presented in bar graph. Images are representative of data. Data are presented as means  $\pm$  SD. \**P* < 0.05, \*\**P* < 0.01.

# Supporting Figure 1

A

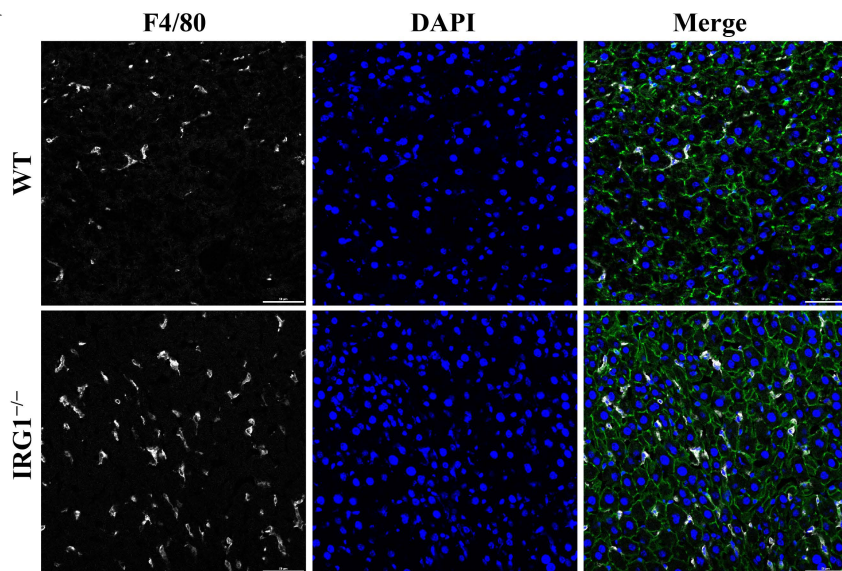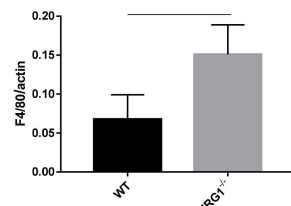

B

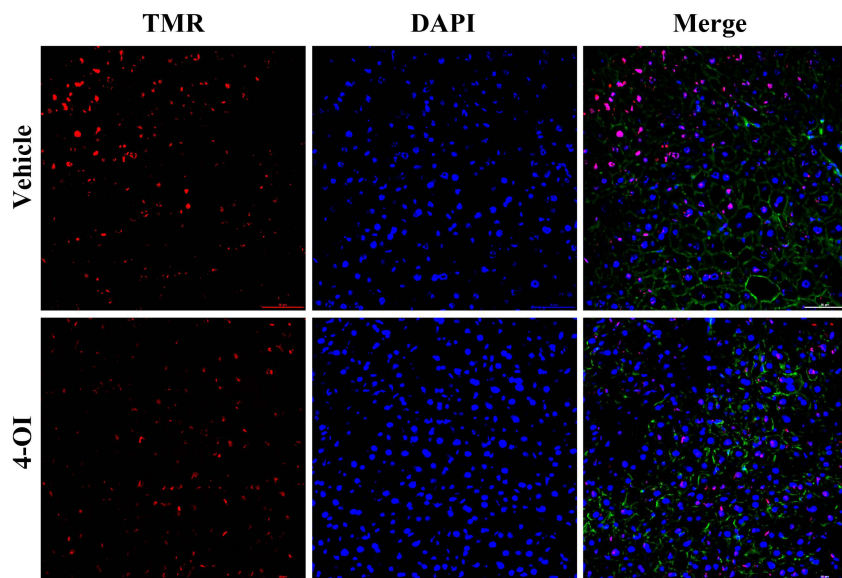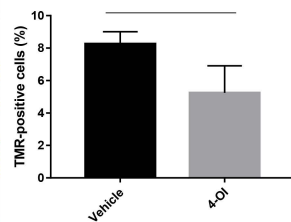

# Supporting Figure 2

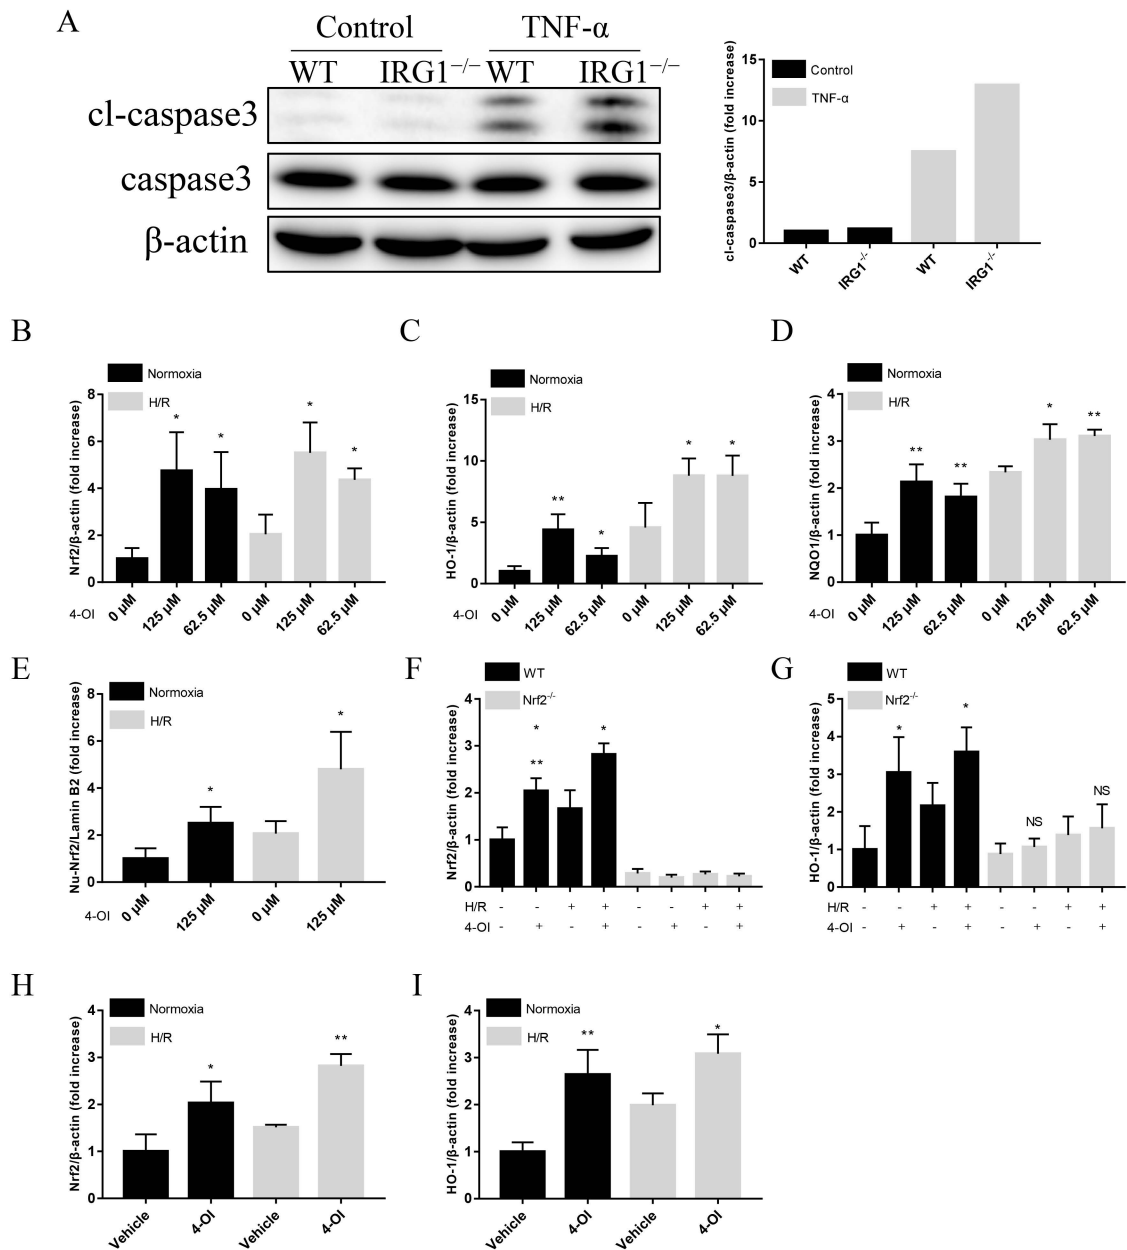

Supplement: HEP-72-1394-s001.pdf [file HEP-72-1394-s001.pdf]
